# Supplementary material
Source: publisher figshare collection journal article supplement (https://acs.figshare.com/ndownloader/files/12441434)
Supplement: Supplementary file 1 [file 12441434]

## Supporting Information

### **DFT Study on the H<sub>2</sub> Storage Properties of Sc Decorated Covalent Organic Frameworks Based on Adamantane Units**

Amol Deshmukh,<sup>a,b,c,‡</sup> Thong Nguyen Minh Le,<sup>a,b,c,‡</sup> Cheng-chau Chiu,<sup>a,\*</sup> Jer-Lai Kuo<sup>a,\*</sup>

- <sup>a</sup> Institute of Atomic and Molecular Sciences, Academia Sinica, Daan District, Taipei City 10617, Taiwan
- <sup>b</sup> Molecular Science and Technology Program, Taiwan International Graduate Program, Academia Sinica, Nankang District, Taipei City 11529, Taiwan.
- <sup>c</sup> Department of Physics, National Central University, Zhongli District, Taoyuan City 32001, Taiwan.

‡ Both authors contributed equally

\* cheng.chau.chiu@gmail.com, jlkuo@pub.iam.s.sinica.edu.tw

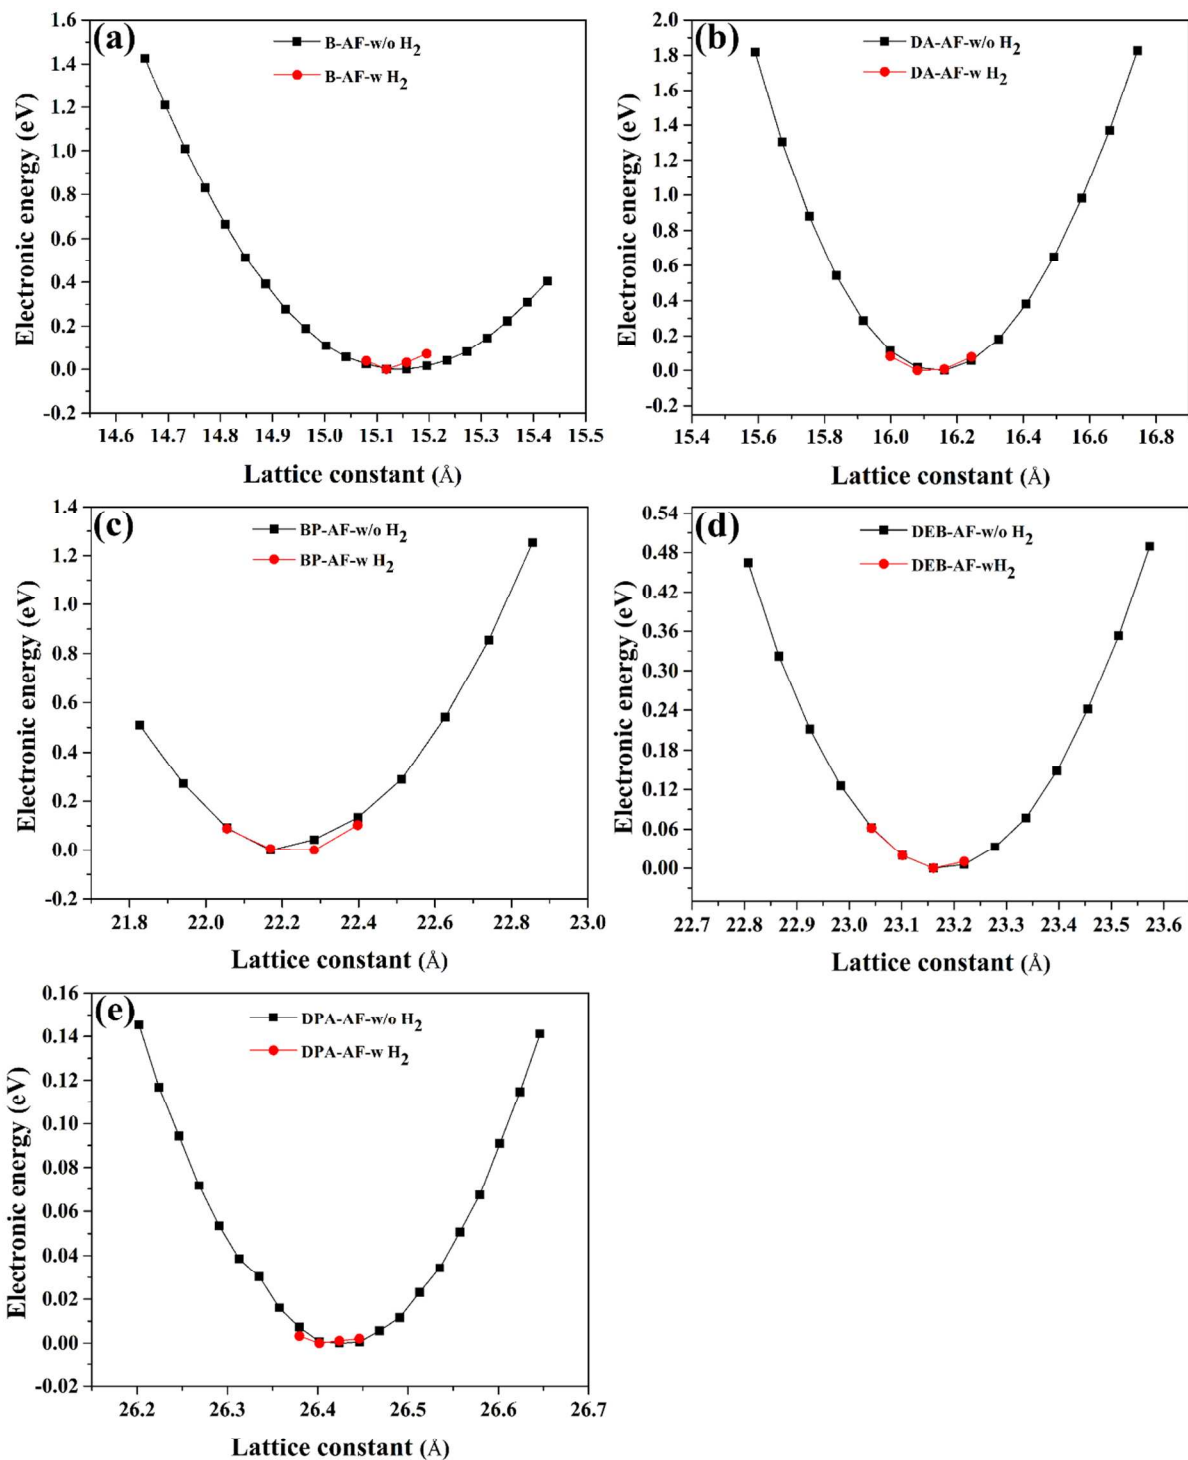

**Fig. S1.** Stability of the unit cells, as characterized by the electronic energy in eV, of (a) B-AF, (b) DA-AF, (c) BP-AF, (d) DEB-AF and (e) DPA-AF as a function of the lattice constant. The black squares denote a unit cell without any  $H_2$  adsorbed, the red dots represent unit cells at full  $H_2$  coverage. The electronic energies of the minima are arbitrarily set to zero.

**Table S1:** Selected geometric parameters as well as the masses of the AFs under study.

| Framework | Volume<br>(Å <sup>3</sup> ) | Unit cell vector <i>a</i><br>(Å) | Mass, full H <sub>2</sub><br>coverage<br>(amu) | Mass, no H <sub>2</sub><br>(amu) |
|-----------|-----------------------------|----------------------------------|------------------------------------------------|----------------------------------|
| B-AF      | 2462                        | 15.16                            | 1352.87                                        | 1288.23                          |
| DA-AF     | 2985                        | 16.16                            | 1240.66                                        | 1176.02                          |
| BP-AF     | 7704                        | 22.17                            | 1657.26                                        | 1592.62                          |
| DEB-AF    | 8784                        | 23.16                            | 1545.05                                        | 1480.41                          |
| DPA-AF    | 13046                       | 26.42                            | 1753.35                                        | 1688.71                          |

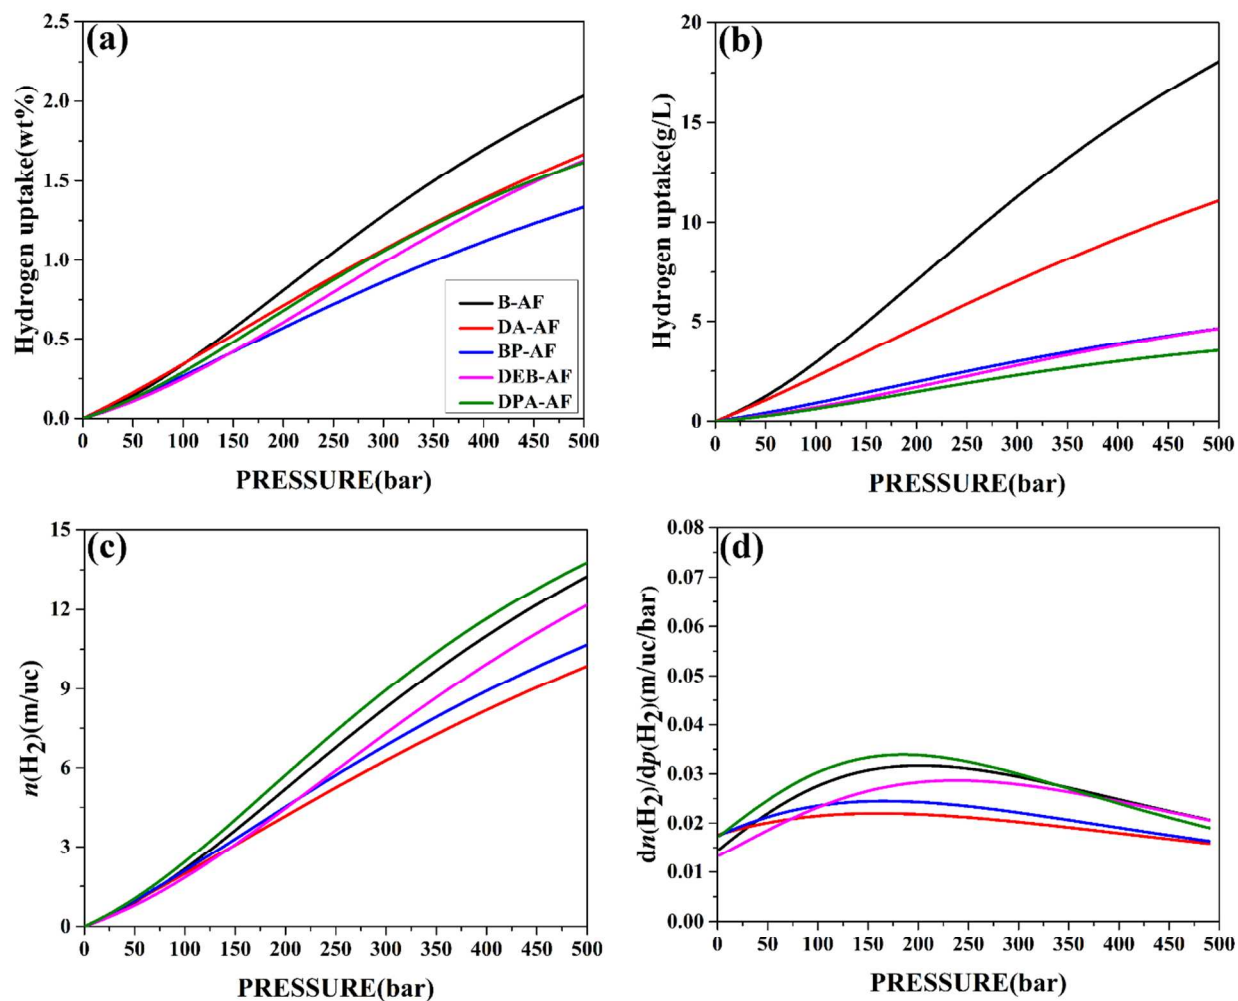

**Fig S2.** (a) Gravimetric, (b) volumetric hydrogen uptakes and (c) the number of adsorbed  $H_2$  molecules per unit cell  $n(H_2)$  (in molecules/unit cell, “m/uc”) as a function of  $H_2$  pressure at 358 K for the five AFs studied here. (d) shows the derivative of  $n(H_2)$  with respect to the  $H_2$  pressure (in molecules/unit cell/bar, “m/uc/bar”)

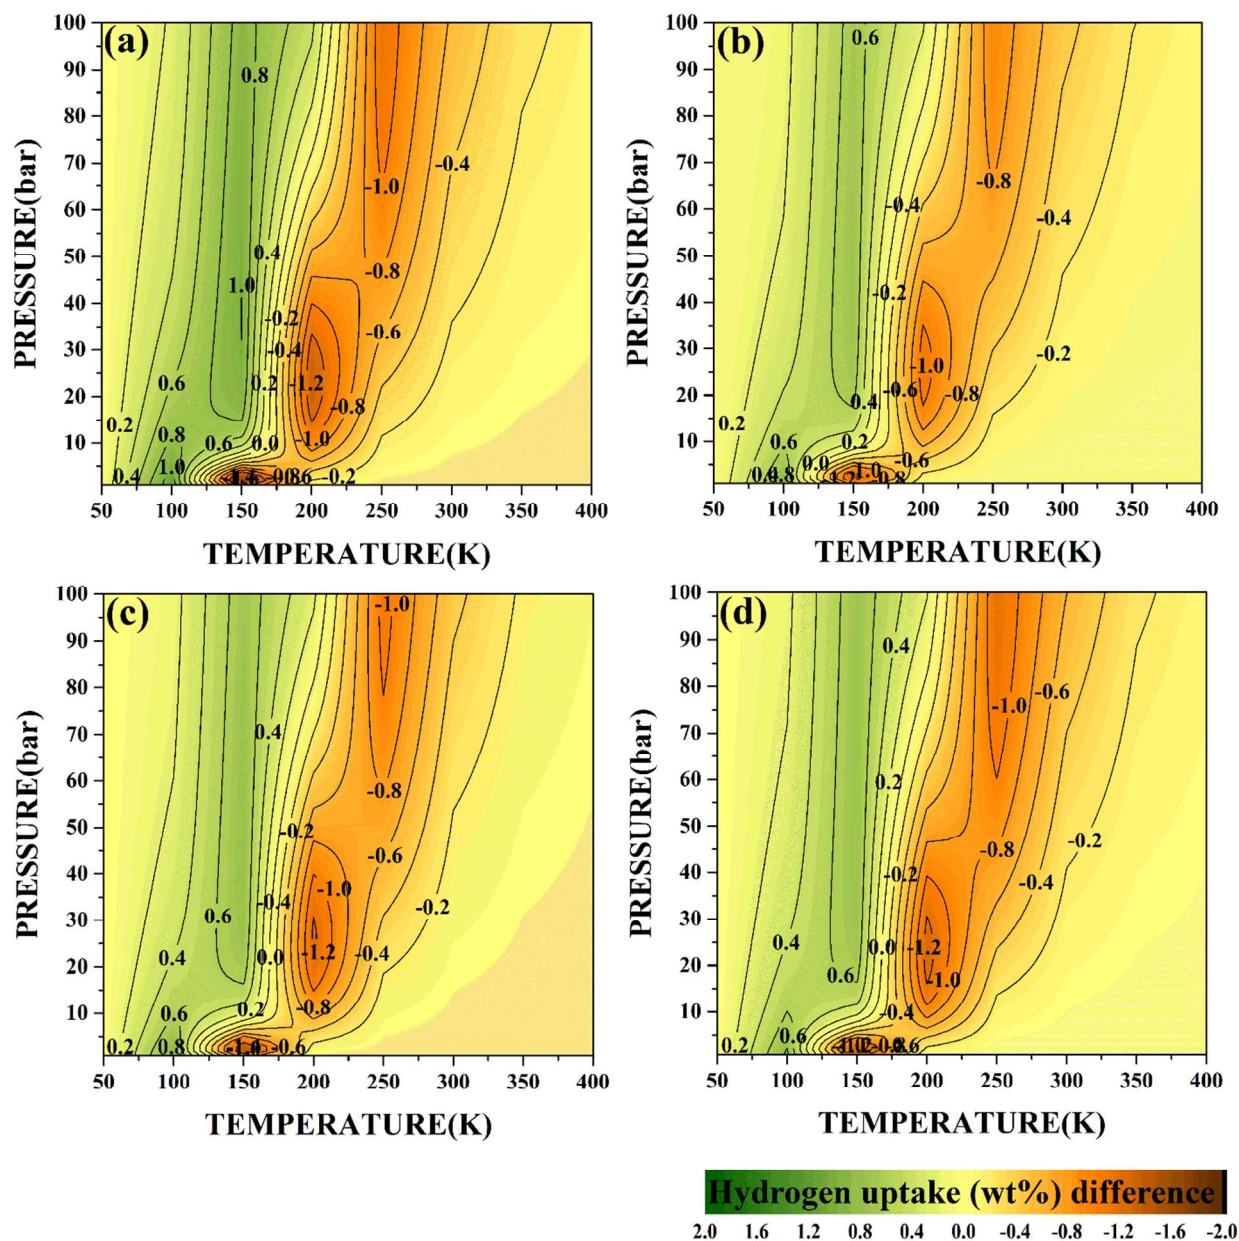

**Fig. S3.** Difference between the gravimetric H<sub>2</sub> uptake calculated with the average Gibbs free energy of adsorption  $\Delta G_{av}^0$  and with explicitly calculated Gibbs free energy of adsorption for each adsorption step: (a) DA-AF, (b) BP-AF (c) DEB-AF and (d) DPA-AF. All values are calculated by subtracting the H<sub>2</sub> uptake obtained by explicitly considering each adsorption step from the values obtained with  $\Delta G_{av}^0$ .

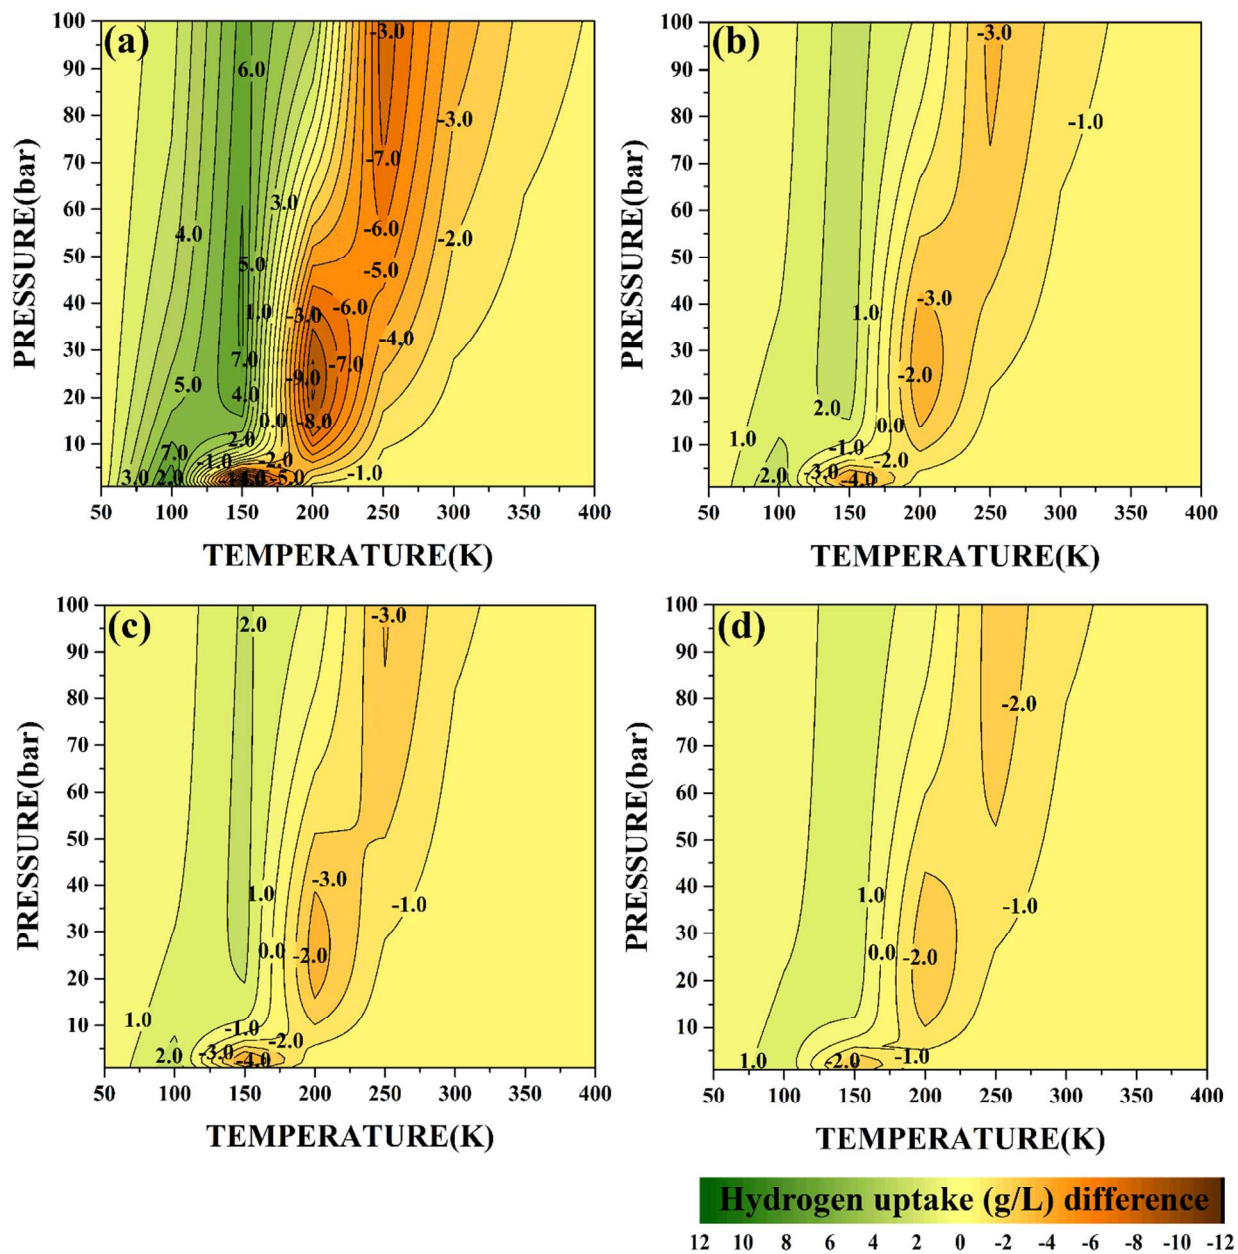

**Fig. S4.** Difference between the volumetric  $H_2$  uptake calculated with the average Gibbs free energy of adsorption  $\Delta G_{av}^0$  and with explicitly calculated Gibbs free energy of adsorption for each adsorption step: (a) DA-AF, (b) BP-AF (c) DEB-AF and (d) DPA-AF. All values are calculated by subtracting the  $H_2$  uptake obtained by explicitly considering each adsorption step from the values obtained with  $\Delta G_{av}^0$ .

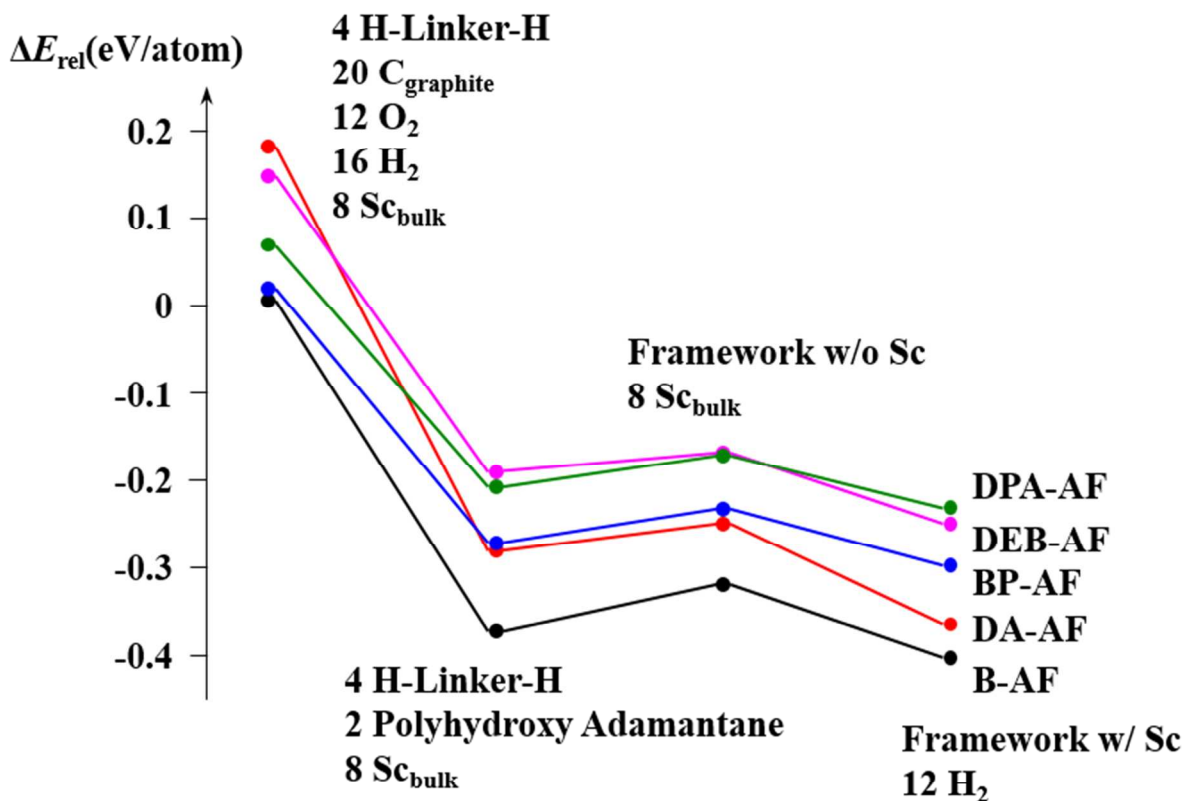

**Fig. S5.** Relative energy  $\Delta E_{\text{rel}}$  of the AFs under study compared to the energies of the separated building blocks as well as to pure elements in the most stable form. The energies shown are normalized by dividing by the number of atoms involved in building up a unit cell, i.e., atoms in a unit cell plus the 12 H<sub>2</sub> molecules (B-AF: 132, DA-AF: 108, BP-AF: 172, DEB-AF: 148, DPA-AF: 180). The energies of C<sub>graphite</sub>, O<sub>2</sub>, H<sub>2</sub>, and Sc<sub>bulk</sub> are set to zero.
